# Supplementary material for: Untargeted metabolomics of purple and orange-fleshed sweet potatoes reveals a large structural diversity of anthocyanins and flavonoids
Source: PubMed Central journal article supplement (PMC8361111; doi:10.1038/s41598-021-95901-y), 2021-08-12
Supplement: 41598_2021_95901_MOESM1_ESM.pdf [file 41598_2021_95901_MOESM1_ESM.pdf]

**Supplementary Fig. 1**

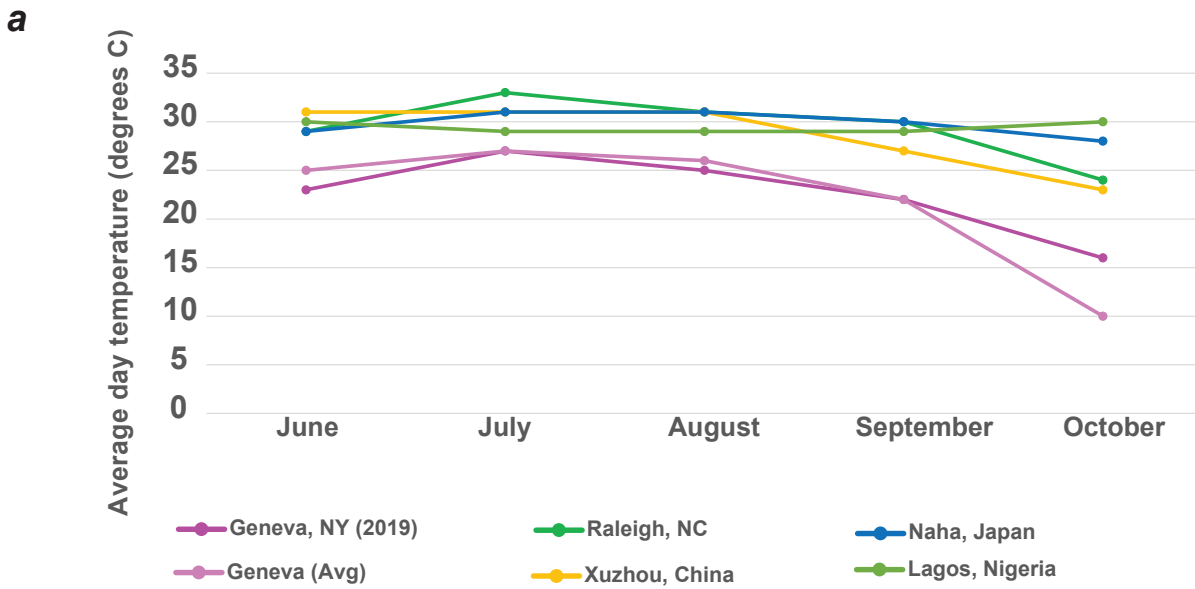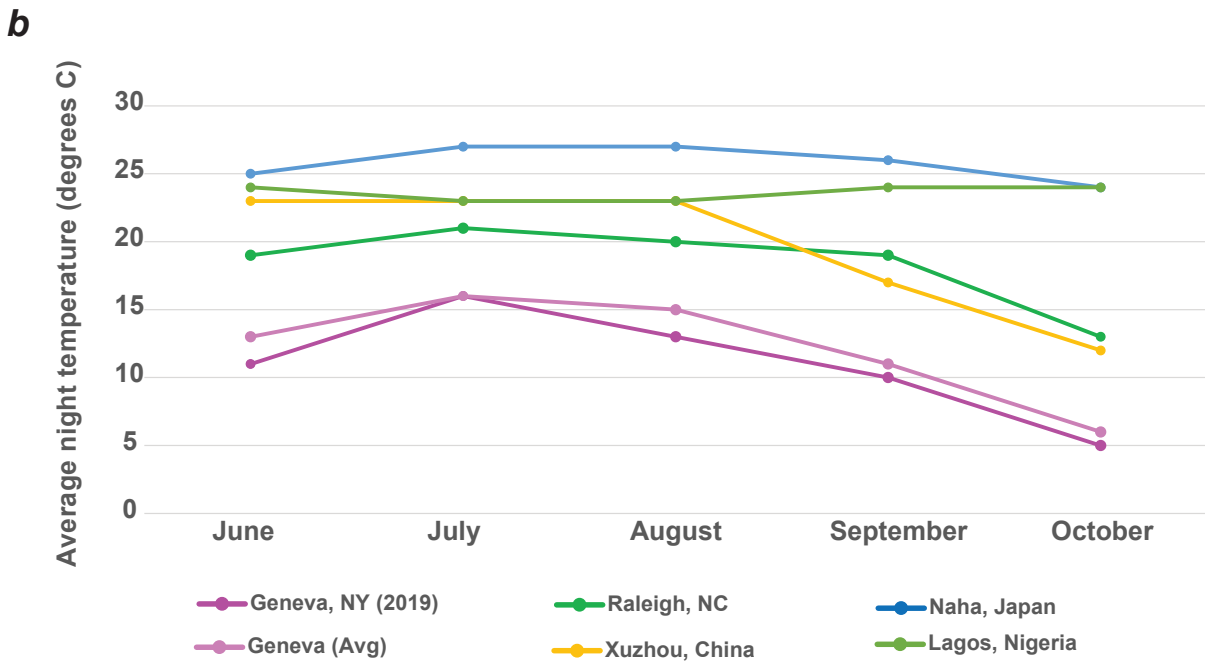

**Supplementary Figure 1: Average high and low temperatures in different sweet potato cultivation areas.** The average high (a) and low (b) temperatures at a given location are shown in lines of the same color. Data for Geneva (2019) was obtained from Weather Underground. All other data is high/low averages from 1985-2015 obtained from TimeAndDate.com.
