# Supplementary material for: Untargeted metabolomics of purple and orange-fleshed sweet potatoes reveals a large structural diversity of anthocyanins and flavonoids
Source: PubMed Central journal article supplement (PMC8361111; doi:10.1038/s41598-021-95901-y), 2021-08-12
Supplement: 41598_2021_95901_MOESM2_ESM.pdf [file 41598_2021_95901_MOESM2_ESM.pdf]

## Supplementary Fig. 2

**A.**

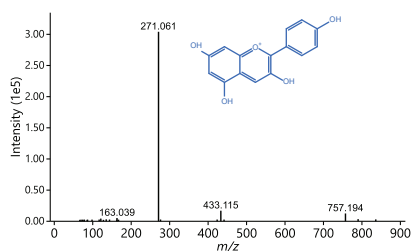

Pelargonidin 3-caffeoyl sophoroside 5-glucoside

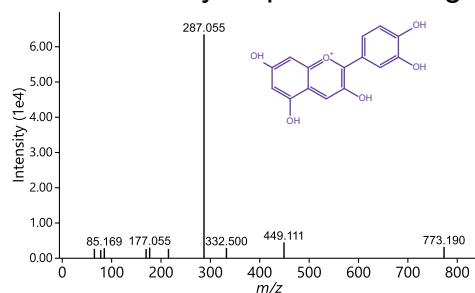

Cyanidin 3-caffeoyl sophoroside 5-glucoside

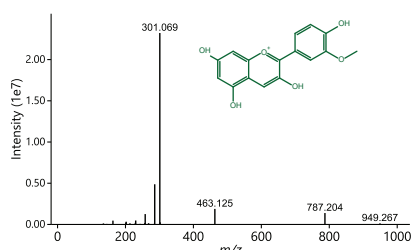

Peonidin 3-caffeoyl sophoroside 5-glucoside

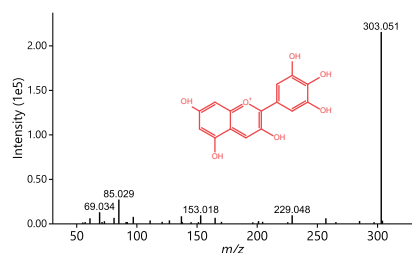

Delphinidin glucoside

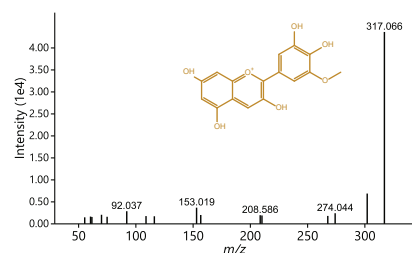

Petunidin glucoside

**B.**

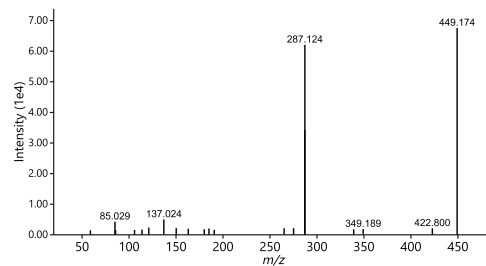

Kaempferol hexoside

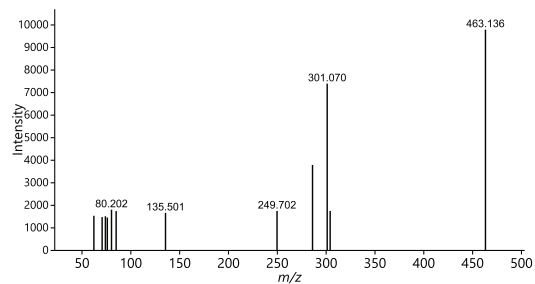

Chrysoeriol hexoside

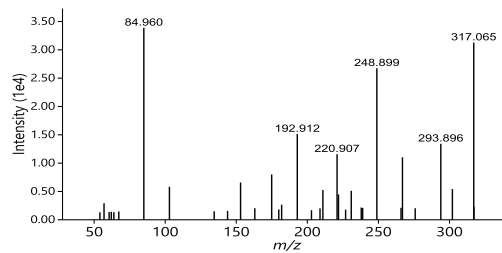

Isorhamnetin

**Supplementary Figure 2: Example MS/MS spectra** of (A) anthocyanins and (B) flavonoids of the same parent ion mass detected in our LC-MS datasets and present in the MS/MS molecular network. (A) Spectra of 3-caffeoyl sophoroside 5-glucoside of cyanidin, peonidin, pelargonidin, petunidin, delphinidin. The aglycone originating from the flavylum core is the most intense fragment. (B) For the tentatively identified flavonoids, there are typically two intense fragments, one with the glucoside.
